# Supplementary material for: Experimental and theoretical evidence of unsupported Ag–Ag interactions in complexes with triazine-based ligands. Subtle effects of the symmetry of the triazine substituents
Source: Royal Society of Chemistry journal article supplement (doi:10.1039/c3nj00738c), 2013-01-01
Supplement: c3nj00738c.pdf [file c3nj00738c.pdf]

## Supplementary information

### Experimental and Theoretical Evidence of Unsupported Ag–Ag Interactions in Complexes with Triazine-based Ligands. Subtle Effects of the Symmetry of the Triazine Substituents

New Journal of Chemistry

M. Pilar Carranza,<sup>†</sup> Blanca R. Manzano<sup>\*†</sup>, Félix A. Jalón,<sup>†</sup> Ana M. Rodríguez,<sup>‡</sup> Lucía Santos<sup>§</sup> and Miquel Moreno<sup>||</sup>

<sup>†</sup> Departamento de Química Inorgánica, Orgánica y Bioquímica, IRICA, Facultad de Ciencias y Tecnologías Químicas, Universidad de Castilla-La Mancha Avda. C. J. Cela, 10, 13071 Ciudad Real, Spain.

<sup>‡</sup> Departamento de Química Inorgánica, Orgánica y Bioquímica, Escuela Técnica Superior de Ingenieros Industriales, Universidad de Castilla-La Mancha Avda. C. J. Cela, 3, 13071 Ciudad Real, Spain.

<sup>§</sup> Departamento de Química-Física, Facultad de Ciencias y Tecnologías Químicas, Universidad de Castilla-La Mancha, Avda. C. J. Cela, 10, 13071 Ciudad Real, Spain.

<sup>||</sup> Departament de Química, Facultat de Ciències, Universitat Autònoma de Barcelona, 08193 Bellaterra, Barcelona, Spain.

**Figure S1.** ORTEP representation of complex **2b B**.

**Figure S2.** Complex **2b A**. Columns of dimers that extend along the *a* axis. The non-covalent interactions between dimers are indicated.

**Figure S3.** 3D structure of complex **2b**.

Way of calculation of I and II as the parameters to measure the lateral and frontal displacement of the monomers in **2b** and **4b** including **Figure S4**.

**Table S1.** Structural parameters for **2b (A and B)**, **4b** and the corresponding optimized structures.

**Figure S5.-** Drawings of the optimized structures for compounds **2b** and **4b**.

**Table S2 .** Cartesian coordinates and absolute energies and Gibbs energies (in hartrees/molec) of the calculated species (PBE1PBE calculations).

**Table S3.** Selected Geometrical distances (in Å) involving the Ag atoms for **2b** y **4b** structures. Rx refers to the crystal structure determined using X-ray diffraction. The theoretical values are obtained through DFT calculations at the PBE1PBE /6-31G\* level of theory.

**Figure S6.** Electronic density and Laplacian of the charge density for the optimized compounds **2b** and **4b** in the plane defined by the atoms Ag(1)-Ag(2)-N(3).

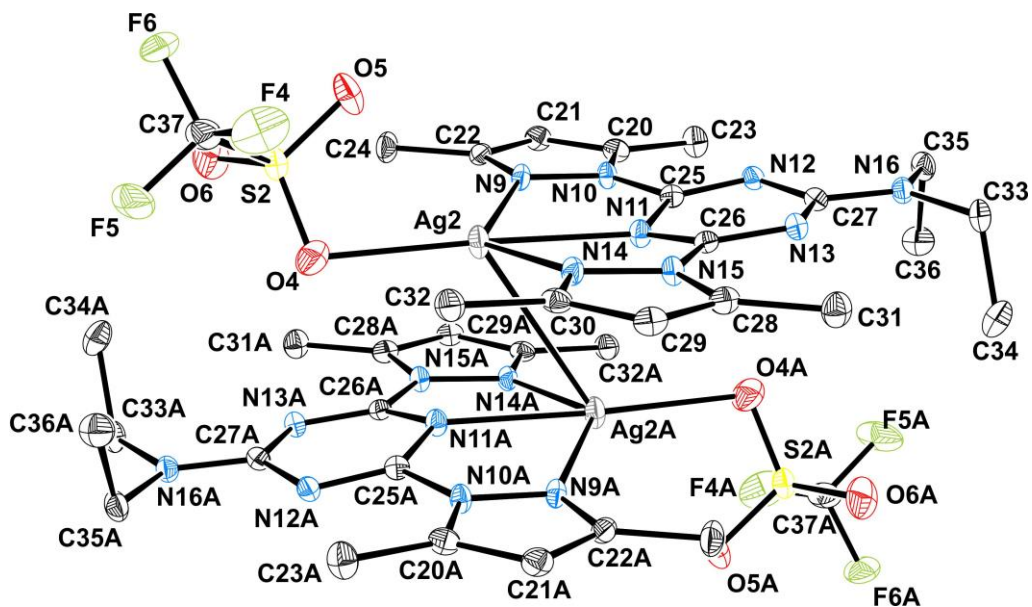

**Figure S1.** ORTEP representation of complex **2b B**.

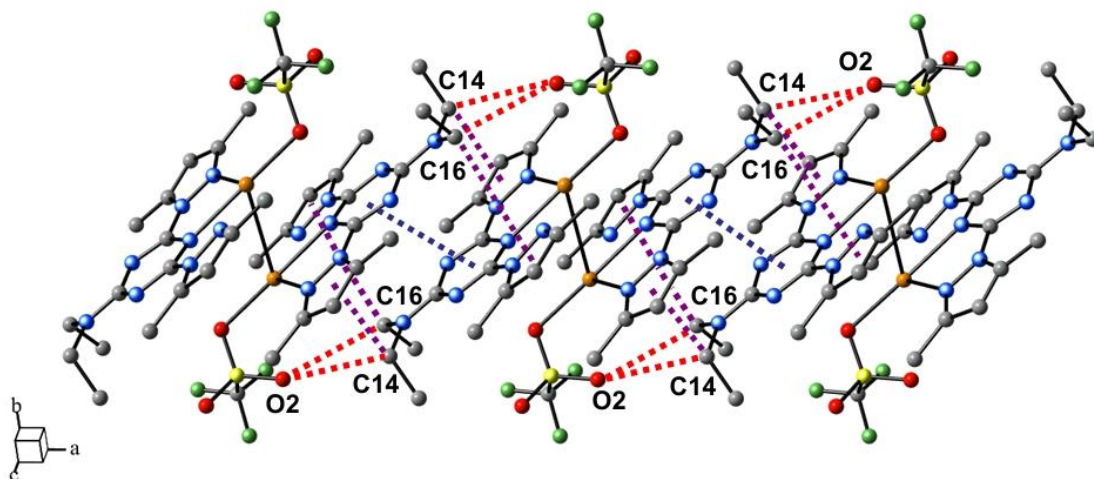

**Figure S2.** Complex **2b A**. Columns of dimers that extend along the *a* axis. The non-covalent interactions between dimers are indicated with dashed lines: red = hydrogen bonds; blue =  $\pi$ - $\pi$  stacking, purple = CH- $\pi$ .

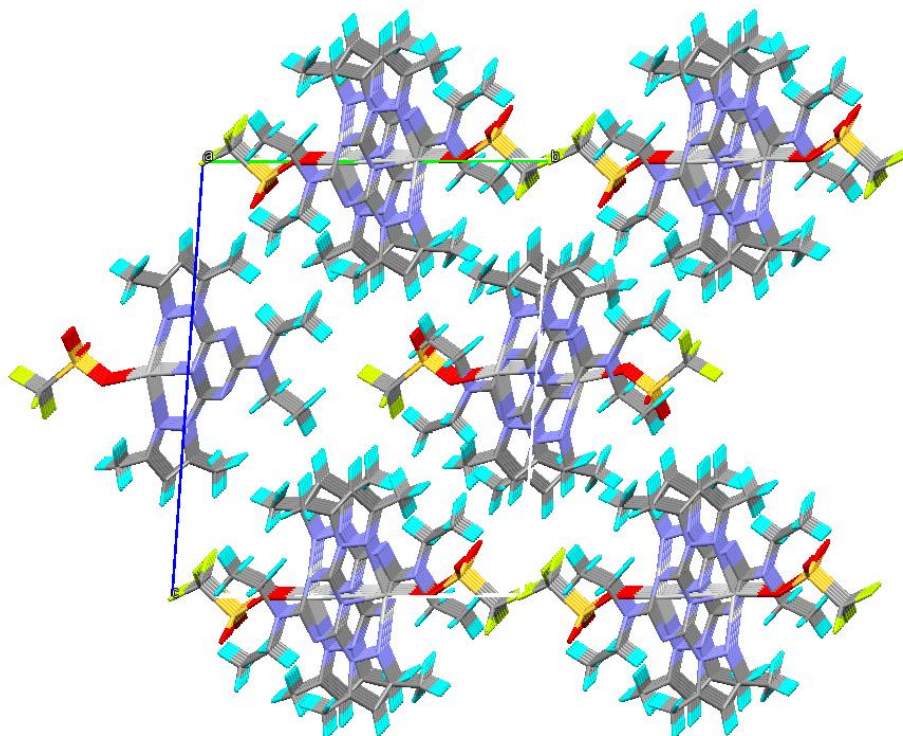

**Figure S3.** 3D structure of complex **2b**.

### Way of calculation of **I** and **II** as the parameters to measure the lateral and frontal displacement of the monomers

Differences in the relative position of the two monomer units are defined in Table S1 using three parameters (**F**, **I** and **II**). This criterion has been applied for both the experimental (**2bA**, **2b B** and **4b**) and calculated structures (**2bopt** and **4opt**). The first parameter, **F**, defines the separation (Å) of the respective planar bpzT ligands of both monomer units. All the non-hydrogen atoms (N and C) have been considered in the calculation of these averaged planes (P1 and P2). Planes P1 and P2 are parallel (dihedral angle 0°) in the experimental structures, due to the existence of a crystallographic inversion center in the Ag<sup>+</sup>Ag axis and this angle is practically also 0° in the calculated structures.

Parameters **I** and **II** measure the respective lateral and frontal displacement of the monomer units relative to each other (see Figure S4). Parameter **I** is defined as the distance (Å) between the straight line running from C<sup>6</sup> to N<sup>3</sup> of the triazine ring in plane P1 and the projection, on this plane, of the corresponding straight line of the second triazine. In order to calculate **I**, an auxiliary plane ( $\sigma_{\text{aux}}$ ) is defined in each of the structures with the four atoms, C<sup>6</sup> and N<sup>3</sup> of both triazine rings. The dihedral angle between planes **P1** and  $\sigma_{\text{aux}}(\theta)$  defines one of the angles of a right-angle triangle defined by **F** and **I** as the triangle cathetus (see Figure S4). Knowing the values of  $\theta$  and **F**, it is possible calculate the value of **I** as:

$$I = \frac{F}{\tan \theta}$$

Analogously, the lateral displacement, measured with the parameter **II**, is defined as the distance (Å) between the two straight lines running between the N-donor atoms of the pyrazole rings of each monomer (direct and projection on plane P1). **II** is calculated in a similar way from the interplanar distance **F** and the dihedral angle ( $\theta'$ ) formed between plane P1 and an auxiliary plane ( $\sigma'_{aux}$ ) that has been created, in this occasion, with the considered four N-donor atoms of the pyrazole rings. In this case:

$$II = \frac{F}{\tan \theta'}$$

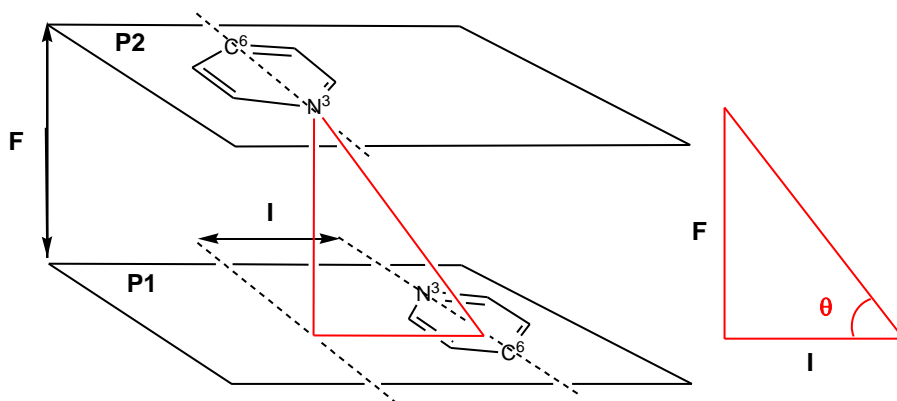

**Figure S4.**  $\theta$  is the dihedral angle formed between planes  $\sigma_{aux}$  and **P1**. Plane  $\sigma_{aux}$  is constructed from the coordinates of atoms  $N^1$  and  $C^4$  of the two triazine rings.

**Table S1.** Structural parameters for **2b (A and B)**, **4b** and the corresponding optimized structures.

| Compound      | F (Å) <sup>a</sup> | $\theta$ (°) | $\theta'$ (°) | Lateral disp. I (Å) <sup>b</sup> | Frontal disp. II (Å) <sup>b</sup> |
|---------------|--------------------|--------------|---------------|----------------------------------|-----------------------------------|
| <b>2b A</b>   | 3.29               | 85.64        | 83.72         | 0.25                             | 0.36                              |
| <b>2b B</b>   | 3.20               | 88.85        | 84.82         | 0.06                             | 0.29                              |
| <b>2b opt</b> | 3.62               | 71.70        | 53.97         | 1.20                             | 2.63                              |
| <b>4b</b>     | 3.11               | 57.86        | 67.02         | 1.95                             | 1.32                              |
| <b>4b opt</b> | 3.46               | 63.46        | 68.21         | 1.73                             | 1.38                              |

<sup>a</sup>F is the distance between the planes of the two ligands of each dimer. <sup>b</sup>See above and Figure S3 for the method used for obtaining its value.

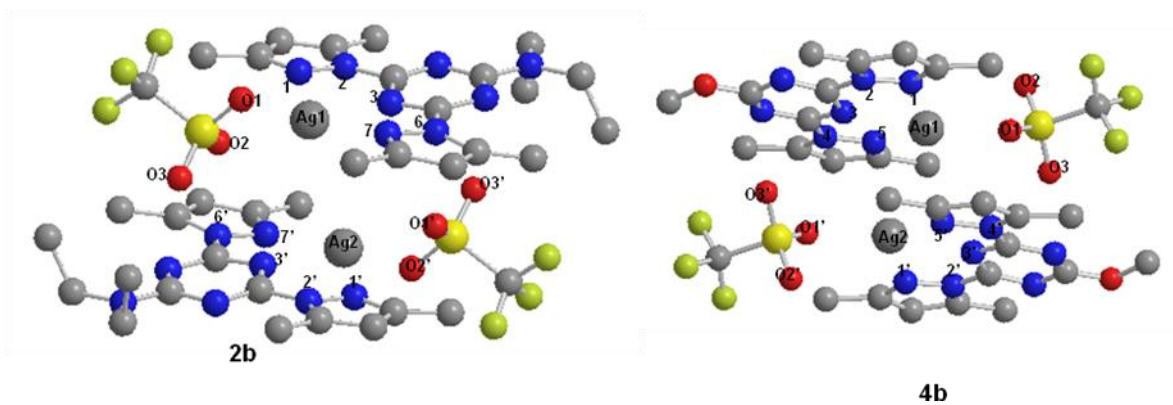

**Figure S5.** Drawings of the optimized structures for compounds **2b** and **4b**

**Table S2** . Cartesian coordinates and absolute energies and Gibbs energies (in hartrees/molec) of the calculated species (PBE1PBE calculations):

**2b**

E(gas): - 4413.60984860 a.u.

G(gas): -4412.839033 a.u.

|   |           |           |           |
|---|-----------|-----------|-----------|
| C | 1.380553  | -5.105986 | 0.814729  |
| C | 0.294516  | -4.396570 | 0.241850  |
| N | 0.723355  | -3.289854 | -0.334771 |
| N | 2.071587  | -3.268760 | -0.152720 |
| C | 2.509161  | -4.371912 | 0.549041  |
| C | 2.811195  | -2.212226 | -0.698494 |
| N | 2.092835  | -1.195198 | -1.163888 |
| C | 2.818734  | -0.253213 | -1.764443 |
| N | 4.126970  | -0.232011 | -1.879822 |
| C | 4.756829  | -1.269242 | -1.285061 |
| N | 4.120648  | -2.320010 | -0.716662 |
| N | 2.087092  | 0.781035  | -2.351044 |
| C | 2.528935  | 1.985112  | -2.847518 |
| C | 1.411790  | 2.610428  | -3.341089 |
| C | 0.320883  | 1.739536  | -3.101906 |
| N | 0.740364  | 0.640896  | -2.498355 |
| C | -1.112817 | 1.944991  | -3.443340 |
| C | 3.923215  | 2.495761  | -2.777622 |
| N | 6.098618  | -1.297224 | -1.312451 |
| C | 6.820505  | -2.360689 | -0.621668 |
| C | 6.968598  | -2.135336 | 0.879003  |
| C | -1.147210 | -4.768341 | 0.219850  |
| C | 3.914919  | -4.659239 | 0.942157  |
| C | 6.854884  | -0.217259 | -1.934081 |
| C | 7.287492  | 0.877474  | -0.966754 |
| H | 1.343372  | -6.041209 | 1.356506  |
| H | 1.382030  | 3.583832  | -3.811098 |
| H | -1.699609 | 1.044524  | -3.242857 |
| H | -1.526643 | 2.779502  | -2.864550 |
| H | -1.220341 | 2.198751  | -4.504000 |
| H | 4.284770  | 2.496429  | -1.745164 |
| H | 4.613254  | 1.888890  | -3.369297 |
| H | 3.936734  | 3.520886  | -3.158652 |
| H | 6.291925  | -3.299225 | -0.807796 |
| H | 7.803116  | -2.436426 | -1.099826 |
| H | 7.414476  | -3.021855 | 1.344445  |
| H | 7.610951  | -1.277884 | 1.097998  |
| H | 5.995743  | -1.941817 | 1.338201  |
| H | -1.517643 | -4.940813 | 1.236209  |
| H | -1.741509 | -3.973341 | -0.235044 |

|    |           |           |           |
|----|-----------|-----------|-----------|
| H  | -1.299510 | -5.692613 | -0.349701 |
| H  | 3.922724  | -5.547608 | 1.579878  |
| H  | 4.547725  | -4.844676 | 0.069613  |
| H  | 4.361523  | -3.824460 | 1.489289  |
| H  | 7.728540  | -0.673637 | -2.414636 |
| H  | 6.230485  | 0.206136  | -2.722451 |
| H  | 7.757853  | 1.696362  | -1.522931 |
| H  | 6.428543  | 1.271591  | -0.418209 |
| H  | 8.015714  | 0.509269  | -0.237601 |
| Ag | -0.274451 | -1.136506 | -1.252083 |
| O  | -2.510533 | -1.548858 | -0.572775 |
| S  | -3.452068 | -1.193585 | -1.682662 |
| C  | -4.385049 | -2.767416 | -1.885417 |
| F  | -3.554610 | -3.767143 | -2.187385 |
| O  | -4.472160 | -0.208803 | -1.306531 |
| O  | -2.779941 | -0.996907 | -2.973447 |
| F  | -5.016258 | -3.084424 | -0.745819 |
| F  | -5.292079 | -2.660022 | -2.849850 |
| Ag | 0.274352  | 1.136784  | 1.253123  |
| O  | 2.510464  | 1.548114  | 0.573296  |
| S  | 3.452053  | 1.193045  | 1.683211  |
| O  | 4.471813  | 0.207909  | 1.307191  |
| C  | 4.385328  | 2.766756  | 1.885646  |
| F  | 5.016808  | 3.083473  | 0.746109  |
| F  | 3.555027  | 3.766692  | 2.187280  |
| F  | 5.292180  | 2.659363  | 2.850246  |
| O  | 2.780056  | 0.996961  | 2.974161  |
| N  | -0.723033 | 3.289183  | 0.334438  |
| C  | -0.293773 | 4.395907  | -0.241857 |
| C  | -1.379535 | 5.105826  | -0.814636 |
| C  | -2.508417 | 4.372087  | -0.549144 |
| N  | -2.071272 | 3.268606  | 0.152325  |
| C  | -3.914088 | 4.660023  | -0.942130 |
| C  | 1.148044  | 4.767313  | -0.219348 |
| C  | -2.811233 | 2.212245  | 0.697963  |
| N  | -4.120671 | 2.320271  | 0.715940  |
| C  | -4.757089 | 1.269549  | 1.284196  |
| N  | -4.127464 | 0.232511  | 1.879586  |
| C  | -2.819226 | 0.253507  | 1.764360  |
| N  | -2.093141 | 1.195115  | 1.163481  |
| N  | -6.098881 | 1.297367  | 1.310653  |
| C  | -6.855527 | 0.217607  | 1.932173  |
| C  | -7.288333 | -0.876955 | 0.964737  |
| N  | -2.087690 | -0.780580 | 2.351424  |
| N  | -0.740947 | -0.640529 | 2.498584  |
| C  | -0.321494 | -1.739038 | 3.102417  |
| C  | -1.412474 | -2.609697 | 3.342039  |
| C  | -2.529618 | -1.984395 | 2.848409  |
| C  | -3.924020 | -2.494795 | 2.779192  |
| C  | 1.112363  | -1.944815 | 3.443028  |



|   |           |           |           |
|---|-----------|-----------|-----------|
| C | -6.820388 | 2.360582  | 0.619068  |
| C | -6.966754 | 2.135111  | -0.881758 |
| H | -1.342014 | 6.041270  | -1.356008 |
| H | -4.360966 | 3.825606  | -1.489591 |
| H | -4.546824 | 4.845296  | -0.069499 |
| H | -3.921626 | 5.548647  | -1.579497 |
| H | 1.742374  | 3.970742  | 0.232761  |
| H | 1.518071  | 4.943156  | -1.235265 |
| H | 1.300768  | 5.689654  | 0.353233  |
| H | -6.231338 | -0.205996 | 2.720587  |
| H | -7.729119 | 0.674214  | 2.412639  |
| H | -7.759399 | -1.695524 | 1.520787  |
| H | -8.016049 | -0.508379 | 0.235266  |
| H | -6.429377 | -1.271599 | 0.416570  |
| H | -1.382803 | -3.582894 | 3.812483  |
| H | -3.937636 | -3.519709 | 3.160789  |
| H | -4.613702 | -1.887468 | 3.370824  |
| H | -4.286029 | -2.495950 | 1.746894  |
| H | 1.220191  | -2.202930 | 4.502586  |
| H | 1.526609  | -2.776597 | 2.860620  |
| H | 1.698567  | -1.043209 | 3.245931  |
| H | -7.803548 | 2.435952  | 1.096152  |
| H | -6.292374 | 3.299331  | 0.805764  |
| H | -7.412262 | 3.021518  | -1.347765 |
| H | -5.993348 | 1.941675  | -1.339823 |
| H | -7.608689 | 1.277511  | -1.101401 |

#### 4b

E(gas): - 4217.69553637 a.u.

G(gas): -4217.111367 a.u.

|    |           |           |           |
|----|-----------|-----------|-----------|
| Ag | 0.868308  | 1.253620  | 0.332909  |
| S  | -0.869483 | 3.983597  | -0.490045 |
| O  | -0.563236 | 3.020031  | 0.621815  |
| O  | 0.290789  | 4.492936  | -1.218429 |
| O  | -2.030224 | 3.581272  | -1.296441 |
| N  | 2.034040  | 1.264006  | 2.554652  |
| N  | 4.236643  | -1.439084 | 1.875061  |
| N  | 1.545022  | 0.247957  | -1.766478 |
| N  | 4.009098  | -1.964594 | -0.437862 |
| N  | 2.461564  | -0.759257 | -1.701821 |
| N  | 2.878003  | 0.219443  | 2.775427  |
| N  | 2.593932  | -0.366271 | 0.562553  |
| O  | 5.431778  | -3.080320 | 0.963237  |
| C  | 2.709216  | -1.299115 | -2.945896 |
| C  | 3.044122  | -1.059457 | -0.474589 |
| C  | 0.261337  | 1.402836  | -3.511827 |
| H  | -0.208293 | 1.926430  | -2.676436 |



|    |           |           |           |
|----|-----------|-----------|-----------|
| H  | -0.518143 | 0.949060  | -4.133659 |
| H  | 0.777566  | 2.153115  | -4.121615 |
| C  | 3.257548  | -0.577044 | 1.696492  |
| C  | 3.271476  | 0.147156  | 4.096619  |
| C  | 1.221135  | 0.368648  | -3.041803 |
| C  | 4.518762  | -2.151934 | 0.780595  |
| C  | 1.928527  | -0.583937 | -3.816881 |
| H  | 1.871443  | -0.729585 | -4.886737 |
| C  | 1.886437  | 1.865538  | 3.719078  |
| C  | 2.640426  | 1.195246  | 4.718251  |
| H  | 2.715915  | 1.450013  | 5.766491  |
| C  | 3.612925  | -2.443113 | -3.235278 |
| H  | 3.553587  | -2.670092 | -4.303231 |
| H  | 3.317508  | -3.326966 | -2.664251 |
| H  | 4.651489  | -2.218697 | -2.977420 |
| C  | 1.036298  | 3.081678  | 3.850193  |
| H  | 0.597107  | 3.352050  | 2.886082  |
| H  | 1.629061  | 3.927370  | 4.217011  |
| H  | 0.225281  | 2.913421  | 4.567728  |
| C  | 4.168184  | -0.886592 | 4.680428  |
| H  | 4.213221  | -0.736908 | 5.762580  |
| H  | 5.178788  | -0.826425 | 4.267817  |
| H  | 3.805782  | -1.897635 | 4.472934  |
| C  | -1.456147 | 5.429536  | 0.490352  |
| F  | -2.566752 | 5.120757  | 1.184210  |
| F  | -0.526093 | 5.814024  | 1.362056  |
| F  | -1.744550 | 6.449956  | -0.309499 |
| C  | 5.714971  | -3.953093 | -0.128620 |
| H  | 4.807769  | -4.475514 | -0.437861 |
| H  | 6.451613  | -4.657509 | 0.257446  |
| H  | 6.128270  | -3.395558 | -0.973594 |
| Ag | -0.868308 | -1.253620 | -0.332909 |
| S  | 0.869483  | -3.983597 | 0.490045  |
| O  | 0.563236  | -3.020031 | -0.621815 |
| O  | -0.290789 | -4.492936 | 1.218429  |
| O  | 2.030224  | -3.581272 | 1.296441  |
| N  | -2.034040 | -1.264006 | -2.554652 |
| N  | -4.236643 | 1.439084  | -1.875061 |
| N  | -1.545022 | -0.247957 | 1.766478  |
| N  | -4.009098 | 1.964594  | 0.437862  |
| N  | -2.461564 | 0.759257  | 1.701821  |
| N  | -2.878003 | -0.219443 | -2.775427 |
| N  | -2.593932 | 0.366271  | -0.562553 |
| O  | -5.431778 | 3.080320  | -0.963237 |
| C  | -2.709216 | 1.299115  | 2.945896  |
| C  | -3.044122 | 1.059457  | 0.474589  |
| C  | -0.261337 | -1.402836 | 3.511827  |
| H  | 0.208293  | -1.926430 | 2.676436  |
| H  | 0.518143  | -0.949060 | 4.133659  |
| H  | -0.777566 | -2.153115 | 4.121615  |

|   |           |           |           |
|---|-----------|-----------|-----------|
| C | -3.257548 | 0.577044  | -1.696492 |
| C | -3.271476 | -0.147156 | -4.096619 |
| C | -1.221135 | -0.368648 | 3.041803  |
| C | -4.518762 | 2.151934  | -0.780595 |
| C | -1.928527 | 0.583937  | 3.816881  |
| H | -1.871443 | 0.729585  | 4.886737  |
| C | -1.886437 | -1.865538 | -3.719078 |
| C | -2.640426 | -1.195246 | -4.718251 |
| H | -2.715915 | -1.450013 | -5.766491 |
| C | -3.612925 | 2.443113  | 3.235278  |
| H | -3.553587 | 2.670092  | 4.303231  |
| H | -3.317508 | 3.326966  | 2.664251  |
| H | -4.651489 | 2.218697  | 2.977420  |
| C | -1.036298 | -3.081678 | -3.850193 |
| H | -0.597107 | -3.352050 | -2.886082 |
| H | -1.629061 | -3.927370 | -4.217011 |
| H | -0.225281 | -2.913421 | -4.567728 |
| C | -4.168184 | 0.886592  | -4.680428 |
| H | -4.213221 | 0.736908  | -5.762580 |
| H | -5.178788 | 0.826425  | -4.267817 |
| H | -3.805782 | 1.897635  | -4.472934 |
| C | 1.456147  | -5.429536 | -0.490352 |
| F | 2.566752  | -5.120757 | -1.184210 |
| F | 0.526093  | -5.814024 | -1.362056 |
| F | 1.744550  | -6.449956 | 0.309499  |
| C | -5.714971 | 3.953093  | 0.128620  |
| H | -4.807769 | 4.475514  | 0.437861  |
| H | -6.451613 | 4.657509  | -0.257446 |
| H | -6.128270 | 3.395558  | 0.973594  |

**Table S3.** Selected Geometrical distances (in Å) involving the Ag atoms for 2b y 4b structures. Rx refers to the crystal structure determined using X-ray diffraction. The theoretical values are obtained through DFT calculations at the PBE1PBE /6-31G\* level of theory (see Figure S4 for the numeration).

|              | <b>2b</b>    |            | <b>4b</b>    |            |
|--------------|--------------|------------|--------------|------------|
|              | Experimental | Calculated | Experimental | Calculated |
| d (Ag1- N1)  | 2.446        | 2.544      | 2.503        | 2.509      |
| d (Ag1- N3)  | 2.394        | 2.370      | 2.393        | 2.378      |
| d (Ag1-N7)   | 2.390        | 2.396      | 2.283        | 2.424      |
| d (Ag1-Ag2)  | 3.194        | 3.427      | 3.132        | 3.122      |
| d (Ag2- N1') | 2.446        | 2.544      | 2.503        | 2.509      |
| d (Ag2- N3') | 2.394        | 2.370      | 2.393        | 2.378      |
| d (Ag2-N7')  | 2.391        | 2.396      | 2.383        | 2.424      |

**Figure S6.** Electronic density and Laplacian of the charge density for the optimized compounds **2b** and **4b** in the plane defined by the atoms Ag(1)-Ag(2)-N(3) (see Figure S5 for the numeration). Blue contours indicate a positive value whereas the red contours correspond to negative values of the measured magnitude. To be noted that the Laplacian has a positive value at the critical points corresponding to the Ag-Ag bond.

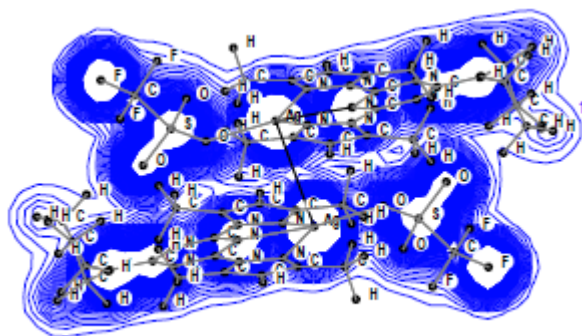

a) Electronic density for compound **2b**

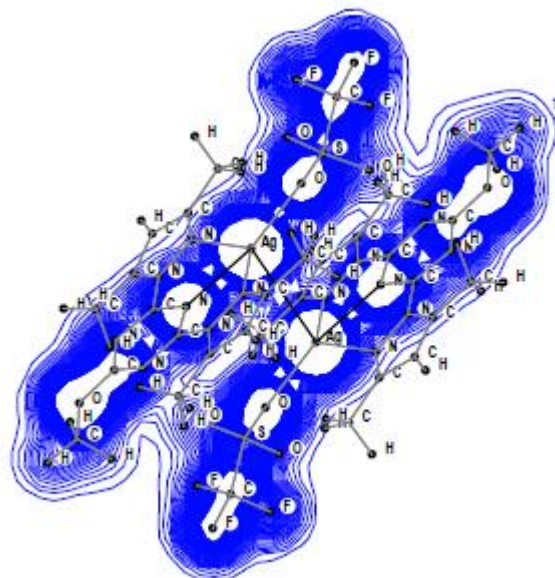

b) Electronic density for compound **4b**

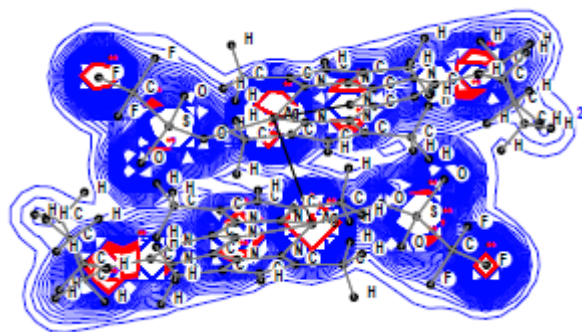

c) Laplacian for compound **2b**

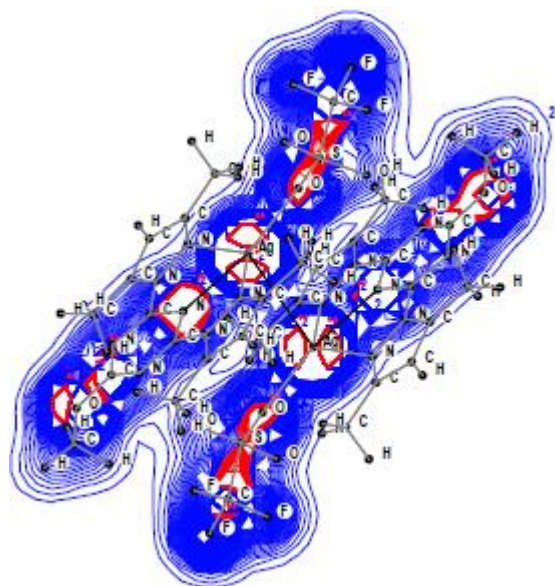

d) Laplacian for compound **4b**
